# Supplementary material for: Untargeted Metabolomic Approach to Study the Impact of Aging on Salivary Metabolome in Women
Source: MDPI journal article supplement (doi:10.3390/metabo12100986), 2022-10-18
Supplement: s1 [file s1]

**SM1: *m/z* values of features statistically over- or under-expressed with age after analysis in RP-LC or HILIC coupled to HRMS in positive or negative mode**

| <i>m/z</i><br>observed | Fold<br>change* | OVER or UNDER<br>expressed | p-value | Method  | Retention time<br>(min) |
|------------------------|-----------------|----------------------------|---------|---------|-------------------------|
| 102.058                | 2.7             | OVER                       | 0.009   | RP-LC-  | 1.75                    |
| 103.056                | 2.4             | OVER                       | 0.018   | RP-LC + | 5.04                    |
| 104.037                | 2.6             | OVER                       | 0.001   | RP-LC-  | 1.69                    |
| 106.95                 | 2.5             | UNDER                      | 0.002   | HILIC + | 2.46                    |
| 112.9                  | 1.8             | UNDER                      | 0.05    | RP-LC + | 1.76                    |
| 112.985**              | 1.5             | UNDER                      | 0.0001  | RP-LC-  | 1.59                    |
| 112.986**              | 1.3             | UNDER                      | 0.044   | HILIC-  | 2.32                    |
| 116.071**              | 2.4             | OVER                       | 0.049   | HILIC + | 38.5                    |
| 116.073**              | 1.9             | OVER                       | 0.043   | RP-LC + | 1.9                     |
| 117.02**               | 3               | OVER                       | 0.01    | HILIC-  | 6.61                    |
| 119.051**              | 2.1             | OVER                       | 0.039   | RP-LC + | 2.66                    |
| 120.083                | 2.3             | OVER                       | 0.02    | RP-LC + | 5.04                    |
| 123.046                | 2               | OVER                       | 0.046   | RP-LC + | 2.65                    |
| 128.037                | 4.6             | OVER                       | 0.051   | RP-LC-  | 2.54                    |
| 130.089                | 3.1             | OVER                       | 0.016   | RP-LC-  | 3.12                    |
| 131.083                | 2.3             | OVER                       | 0.016   | RP-LC-  | 1.68                    |
| 132.032                | 1.9             | OVER                       | 0.02    | RP-LC-  | 1.74                    |
| 136.076                | 2.1             | OVER                       | 0.039   | RP-LC + | 2.65                    |
| 137.047                | 3               | OVER                       | 0.029   | RP-LC + | 2.32                    |
| 138.068                | 2               | OVER                       | 0.022   | RP-LC + | 16.41                   |
| 145.101                | 2.8             | OVER                       | 0.003   | RP-LC-  | 1.56                    |
| 146.05                 | 2.5             | OVER                       | 0.01    | RP-LC-  | 1.75                    |
| 165.056                | 2.2             | OVER                       | 0.025   | RP-LC + | 2.65                    |
| 166.087                | 2.5             | OVER                       | 0.033   | RP-LC + | 5.03                    |
| 173.094                | 2.7             | OVER                       | 0.03    | RP-LC + | 2.03                    |
| 182.083                | 2.6             | OVER                       | 0.012   | RP-LC + | 2.65                    |
| 190.913                | 1.5             | UNDER                      | 0.001   | RP-LC + | 1.65                    |
| 195.088                | 1.9             | OVER                       | 0.014   | RP-LC + | 16.41                   |
| 223.026                | 1.9             | OVER                       | 0.037   | RP-LC + | 1.62                    |
| 251.032                | 1.7             | OVER                       | 0.031   | RP-LC + | 1.67                    |
| 256.103                | 2.6             | OVER                       | 0.015   | RP-LC-  | 2.27                    |
| 258.898                | 2.3             | UNDER                      | 0.002   | HILIC + | 2.46                    |
| 264.844                | 2.5             | OVER                       | 0.029   | HILIC + | 2.47                    |
| 264.933**              | 1.8             | UNDER                      | 7.0E-05 | RP-LC-  | 1.57                    |
| 264.939**              | 1.7             | UNDER                      | 0.017   | HILIC-  | 2.32                    |
| 274.872**              | 1.7             | UNDER                      | 0.041   | HILIC + | 2.44                    |
| 274.875**              | 1.5             | UNDER                      | 0.0001  | RP-LC + | 1.65                    |
| 279.236                | 1.9             | OVER                       | 0.019   | RP-LC-  | 53.75                   |
| 293.146                | 3.8             | OVER                       | 0.038   | RP-LC-  | 16.03                   |
| 316.946                | 6               | UNDER                      | 0.043   | RP-LC-  | 1.57                    |
| 332.920**              | 2.8             | UNDER                      | 0.001   | RP-LC-  | 1.57                    |

|           |     |       |       |         |       |
|-----------|-----|-------|-------|---------|-------|
| 332.928** | 2.1 | UNDER | 0.006 | HILIC-  | 2.32  |
| 342.859   | 2.2 | UNDER | 0.006 | HILIC + | 2.44  |
| 348.895** | 1.6 | UNDER | 0.001 | RP-LC-  | 1.57  |
| 348.903** | 1.7 | UNDER | 0.024 | HILIC-  | 2.32  |
| 357.039   | 1.9 | UNDER | 0.003 | HILIC-  | 35.87 |
| 372.819   | 2.7 | OVER  | 0.029 | HILIC-  | 2.32  |
| 373.013   | 1.6 | UNDER | 0.029 | HILIC-  | 35.81 |
| 380.857   | 2.8 | OVER  | 0.024 | RP-LC-  | 1.58  |
| 382.032   | 2   | UNDER | 0.036 | RP-LC-  | 1.85  |
| 384.15    | 4.1 | OVER  | 0.004 | RP-LC + | 1.82  |
| 394.872   | 2.9 | UNDER | 0.011 | HILIC + | 2.46  |
| 400.907   | 3.6 | UNDER | 0.004 | RP-LC-  | 1.56  |
| 410.846   | 2.1 | UNDER | 0.006 | HILIC + | 2.45  |
| 416.897   | 2.2 | UNDER | 0.005 | HILIC-  | 2.32  |
| 422.836   | 1.7 | OVER  | 0.038 | HILIC-  | 2.34  |
| 462.858   | 4.5 | UNDER | 0.005 | HILIC + | 2.46  |
| 478.833   | 2.4 | UNDER | 0.003 | HILIC + | 2.46  |
| 494.807   | 2.1 | UNDER | 0.016 | HILIC + | 2.44  |
| 73.028    | 3   | OVER  | 0.01  | HILIC-  | 6.61  |
| 88.041    | 1.8 | OVER  | 0.044 | RP-LC-  | 1.73  |
| 92.926    | 3.2 | UNDER | 0.026 | RP-LC-  | 1.72  |
| 98.984    | 2.5 | OVER  | 0.014 | HILIC + | 2.27  |
| 102.058   | 2.7 | OVER  | 0.009 | RP-LC-  | 1.75  |

\* Increasing or decreasing fold change between the group of elderly people and the control group

\*\* Features that presents differential expression with age and that were found both in RPLC and HILIC
